# Supplementary material for: Rational synthesis of isomorphic rare earth metal–organic framework materials for simultaneous adsorption and photocatalytic degradation of organic dyes in water
Source: Royal Society of Chemistry journal article supplement (doi:10.1039/d1ce01411k), 2021-11-29
Supplement: d1ce01411k1.pdf [file d1ce01411k1.pdf]

*Electronic Supporting Information*

**Rational synthesis of isomorphous rare earth metal-organic framework materials  
for simultaneous adsorption and photocatalytic degradation of organic dyes in  
water**

Meng-Ting Hang,<sup>a</sup> Yi Cheng,<sup>a</sup> Yi-Tong Wang,<sup>b</sup> Huan Li,<sup>a</sup> Meng-Qi Zheng,<sup>a</sup> Ming-Yang He,<sup>a,\*</sup> Qun Chen,<sup>a</sup> and Zhi-Hui  
Zhang<sup>a,c\*</sup>

<sup>a</sup>*Jiangsu Key Laboratory of Advanced Catalytic Materials and Technology, Advanced Catalysis and Green  
Manufacturing Collaborative Innovation Center, Changzhou University, Changzhou 213164, P.R. China*

<sup>b</sup>*China International Engineering Consulting Corporation, Beijing 100089, China*

<sup>c</sup>*Jiangsu Key Laboratory for Biomass Energy and Material, Jiangsu Province, Nanjing, 210042, China.*

E-mail address: zhangzh@cczu.edu.cn (Z.H.Z.) and hmy@cczu.edu.cn (M.Y.H.).

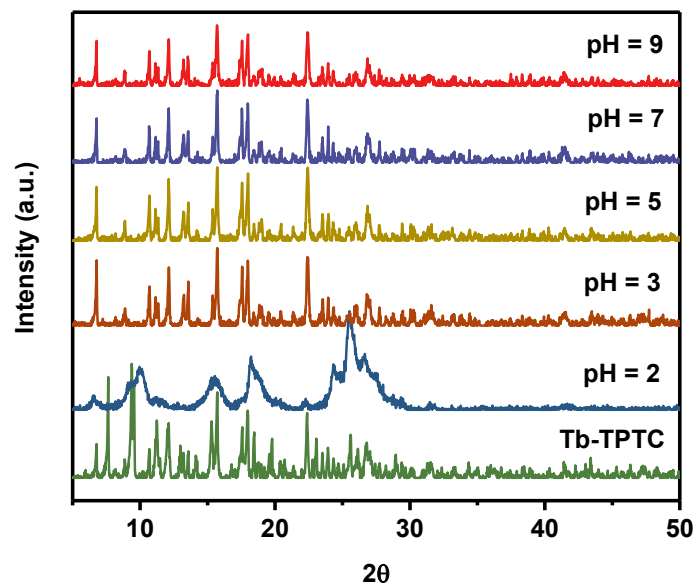

Fig. S1. XRD spectra of Tb-TPTC at different pH values.

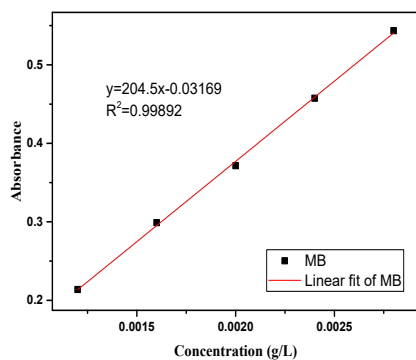

(a)

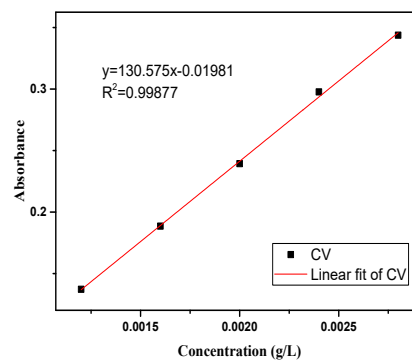

(b)

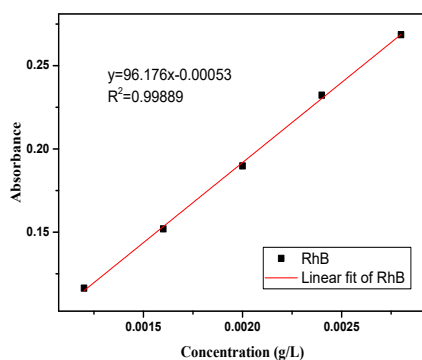

(c)

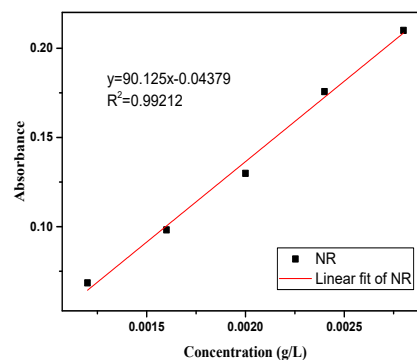

(d)

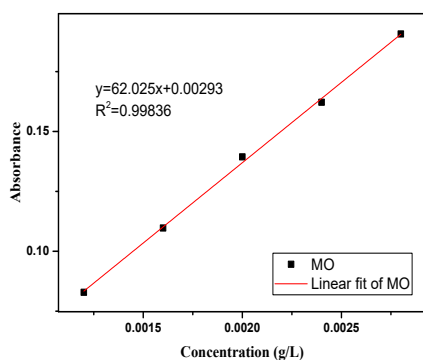

(e)

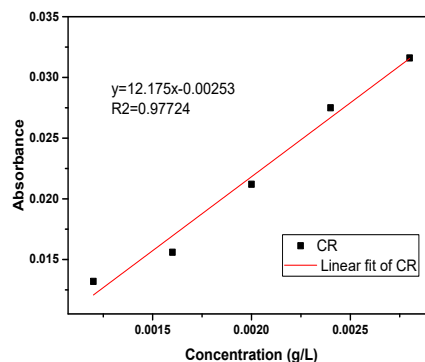

(f)

**Fig. S2** Standard curve diagram of different dyes.

### Photoluminescent Properties

Fig. S3 showed the emission spectra of  $\text{Eu}^{3+} / \text{Tb}^{3+}$  in different ratios. The Eu-TPTC and Tb-TPTC exhibited series of sharp bands corresponding to the characteristic transitions of  $^5\text{D}_0 \rightarrow ^7\text{F}_J$  ( $J = 0-4$ ) and  $^5\text{D}_4 \rightarrow ^7\text{F}_J$  ( $J = 6-3$ ). Eu-TPTC was red, and Tb-TPTC was green. As the  $\text{Eu}^{3+}$  concentration increased, the emission color of the compound also changed from green to orange to red. It was worth noting that the  $\text{Eu}^{3+}$  emission was dominant when the  $\text{Eu}^{3+}$  ratio increased to  $\text{Eu} : \text{Tb} = 4:1$  and the  $\text{Tb}^{3+}$  emission was dominant when the  $\text{Tb}^{3+}$  ratio increased to  $\text{Eu} : \text{Tb} = 1:9$ .

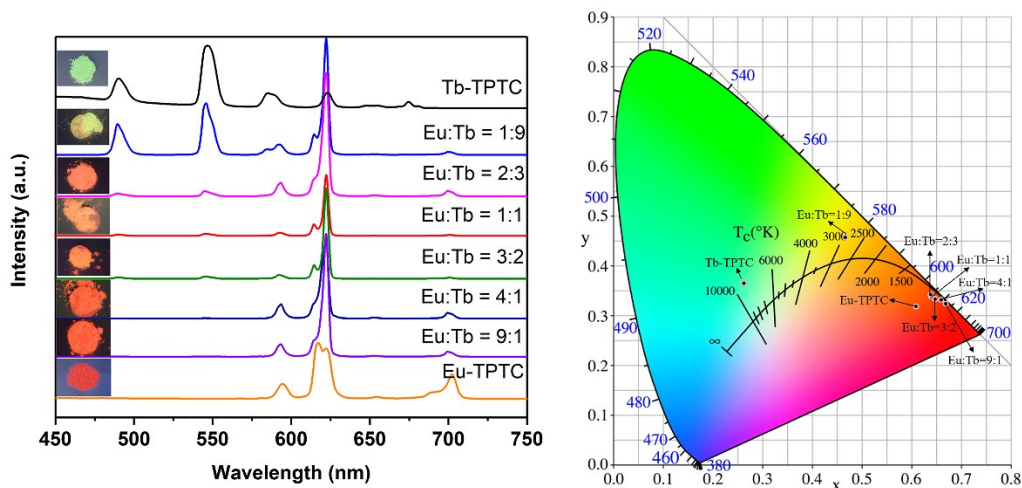

**Fig. S3** Emission spectra of  $\text{Eu}^{3+}/\text{Tb}^{3+}$  with different molar ratios and the corresponding CIE chromaticity.

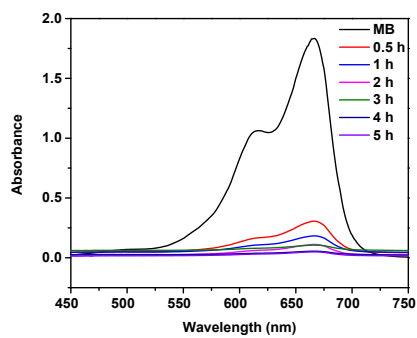

(a)

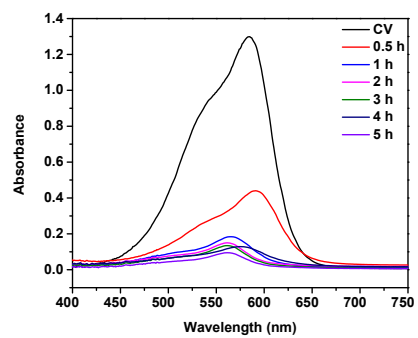

(b)

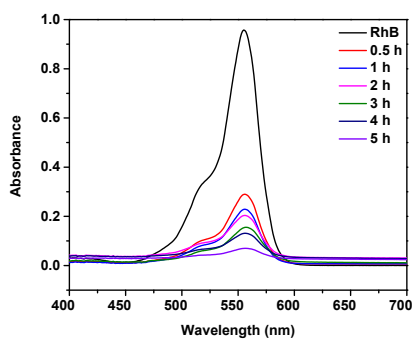

(c)

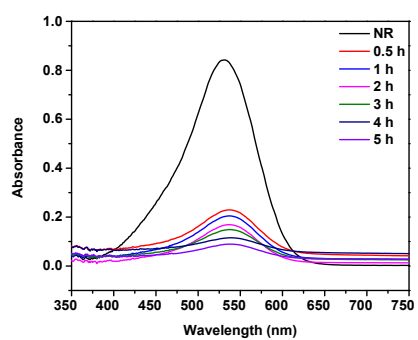

(d)

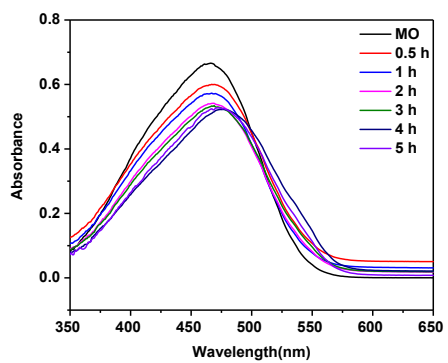

(e)

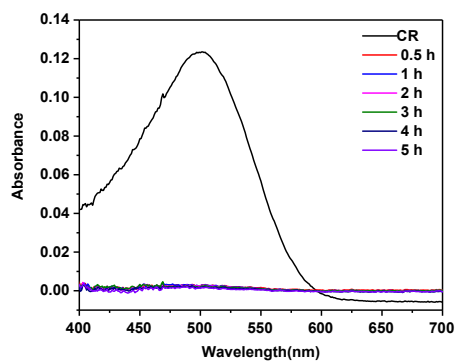

(f)

**Fig. S4** UV-vis absorption spectra of different dyes adsorption over Eu-TPTC.

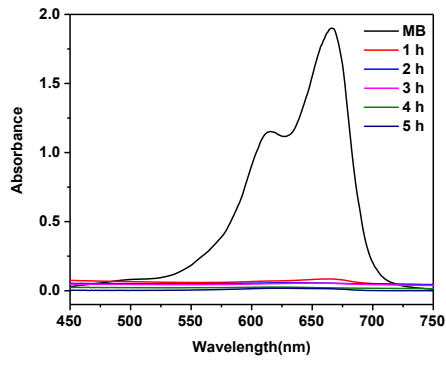

(a)

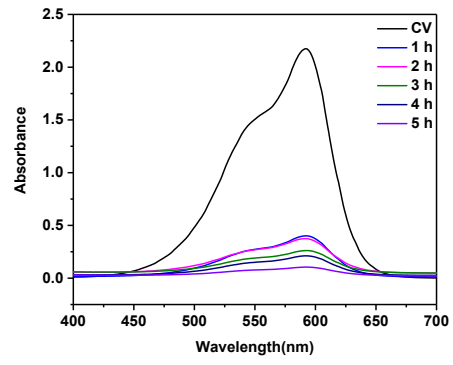

(b)

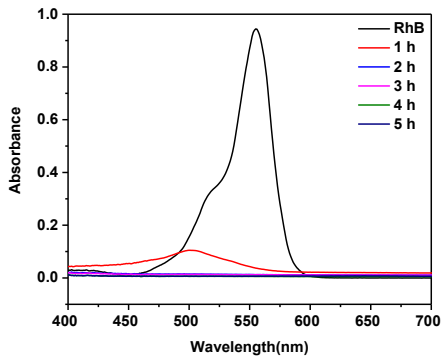

(c)

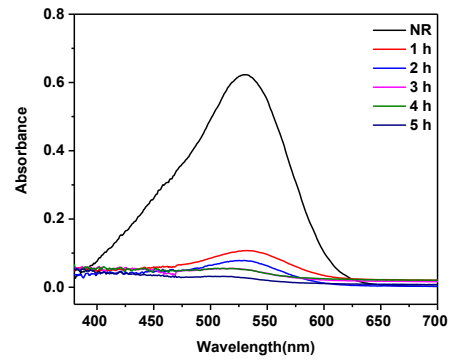

(d)

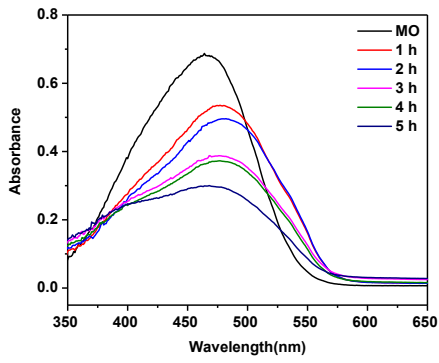

(e)

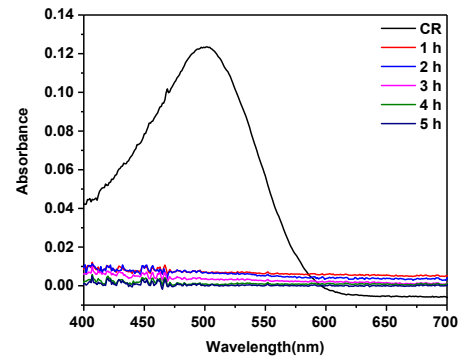

(f)

**Fig. S5** UV-vis absorption spectra of different dyes degradation over Eu-TPTC.

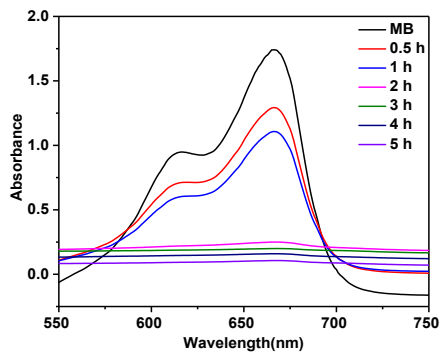

(a)

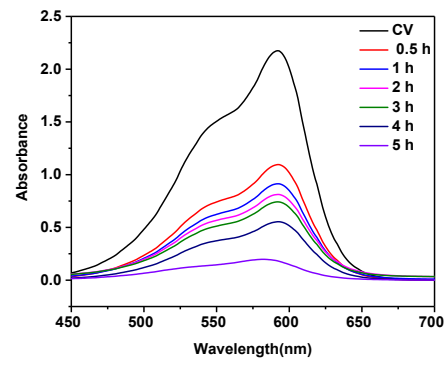

(b)

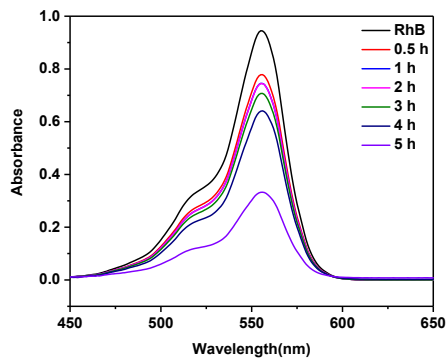

(c)

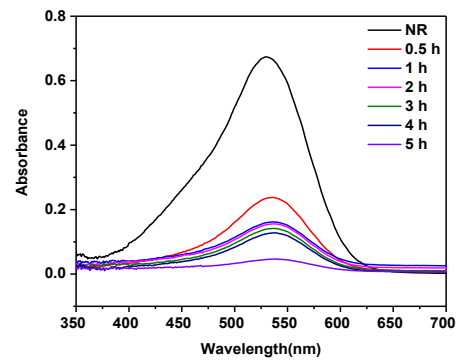

(d)

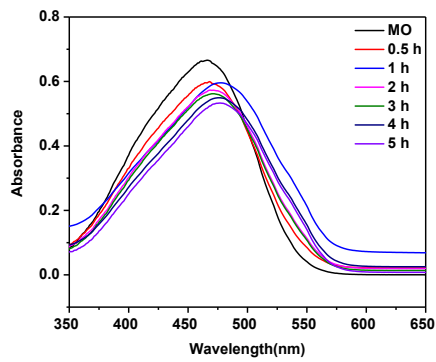

(e)

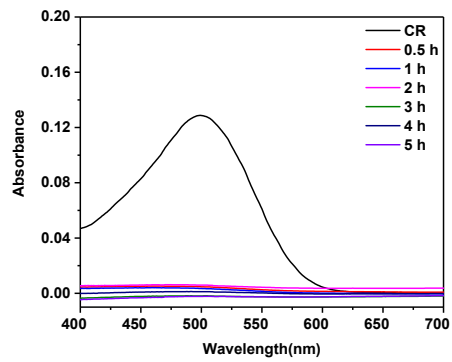

(f)

**Fig. S6** UV-vis absorption spectra of different dyes adsorption over Tb-TPTC.

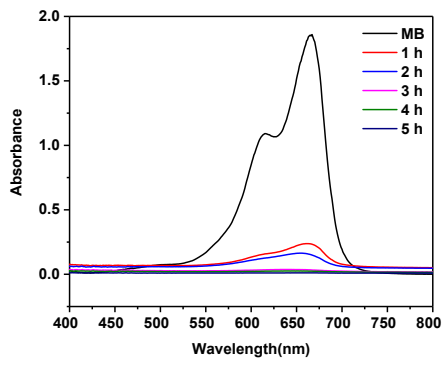

(a)

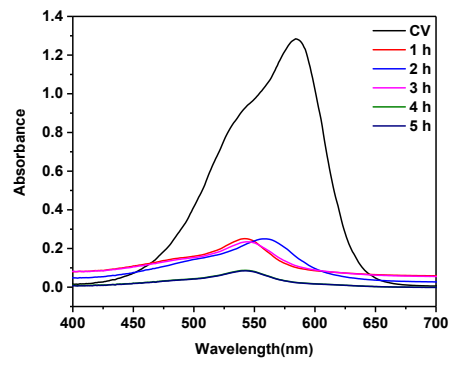

(b)

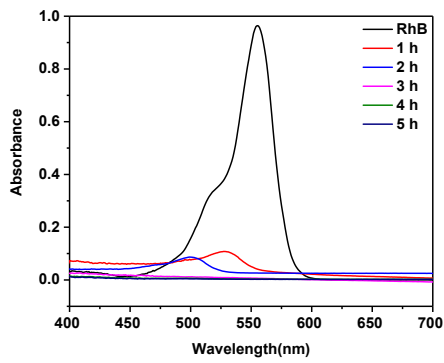

(c)

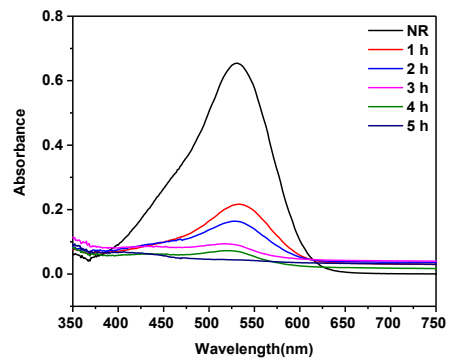

(d)

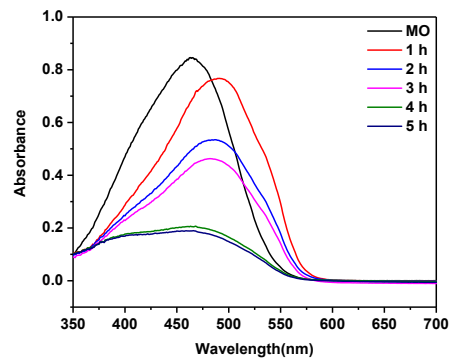

(e)

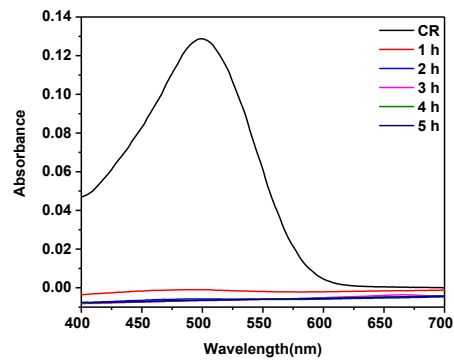

(f)

**Fig. S7** UV-vis absorption spectra of different dyes degradation over Tb-TPTC

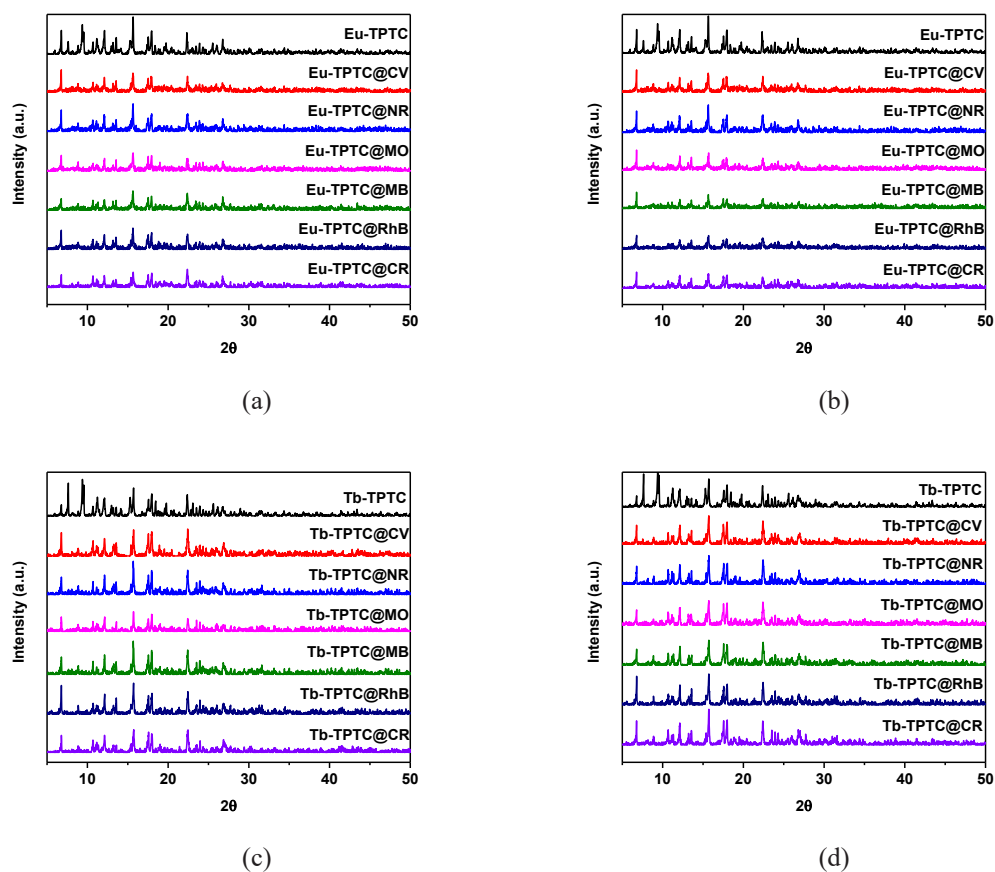

**Fig. S8** (a) XRD patterns of Eu-TPTC before and after adsorption of different dyes; (b) XRD patterns of Eu-TPTC before and after degradation of different dyes; (c) XRD patterns of Tb-TPTC before and after adsorption of different dyes; (d) XRD patterns of Tb-TPTC before and after degradation of different dyes.



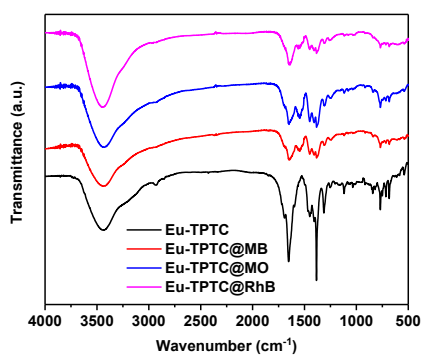

(a)

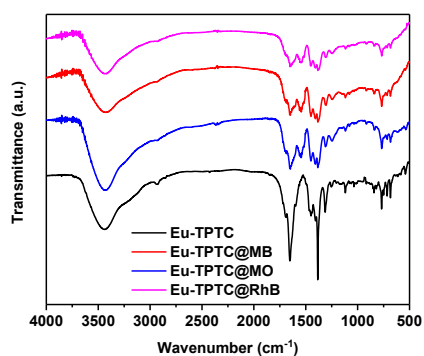

(b)

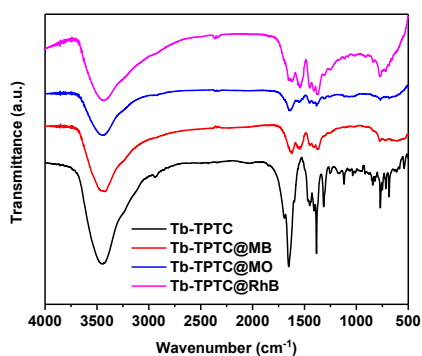

(c)

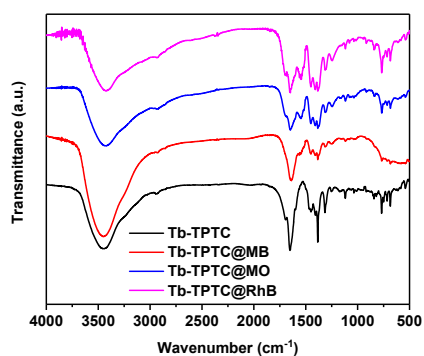

(d)

**Fig. S9** (a) FTIR spectra of Eu-TPTC before and after adsorption of different dyes; (b) FTIR spectra of Eu-TPTC before and after degradation of different dyes; (c) FTIR spectra of Tb-TPTC before and after adsorption of different dyes; (d) FTIR spectra of Tb-TPTC before and after degradation of different dyes.

**Table S1** Selected bond lengths and angles for Eu-TPTC.

| Eu-TPTC       |            |               |            |
|---------------|------------|---------------|------------|
| Bond          | Length/Å   | Bond          | Length/Å   |
| Eu1-O1        | 2.362(4)   | Eu1-O2#2      | 2.357(4)   |
| Eu1-O5#1      | 2.355(4)   | Eu1-O5#3      | 2.690(5)   |
| Eu1-O6#3      | 2.423(5)   | Eu1-O7        | 2.537(5)   |
| Eu1-O8        | 2.496(5)   | Eu1-O10       | 2.435(5)   |
| Eu1-O11       | 2.402(5)   |               |            |
| Bond          | Angles/°   | Bond          | Angles/°   |
| O1-Eu1-O5#3   | 70.05(15)  | O1-Eu1-O6#3   | 77.52(16)  |
| O1-Eu1-O7     | 70.11(17)  | O1-Eu1-O8     | 73.92(18)  |
| O1-Eu1-O10    | 139.84(17) | O1-Eu1-O11    | 133.35(17) |
| O2#2-Eu1-O1   | 134.08(16) | O2#2-Eu1-O5#3 | 68.30(15)  |
| O2#2-Eu1-O6#3 | 90.51(17)  | O2#2-Eu1-O7   | 144.66(17) |
| O2#2-Eu1-O8   | 146.23(18) | O2#2-Eu1-O10  | 74.02(18)  |
| O2#2-Eu1-O11  | 75.68(17)  | O5#1-Eu1-O1   | 73.07(16)  |
| O5#1-Eu1-O2#2 | 77.48(16)  | O5#1-Eu1-O5#3 | 73.69(16)  |
| O5#1-Eu1-O6#3 | 123.14(15) | O5#1-Eu1-O7   | 90.26(18)  |
| O5#1-Eu1-O8   | 135.63(17) | O5#1-Eu1-O8   | 135.63(17) |
| O5#1-Eu1-O11  | 83.82(18)  | O6#3-Eu1-O5#3 | 50.66(14)  |
| O6#3-Eu1-O7   | 123.25(17) | O6#3-Eu1-O8   | 76.49(19)  |
| O6#3-Eu1-O10  | 73.84(18)  | O7-Eu1-O5#3   | 139.86(16) |
| O8-Eu1-O5#3   | 120.44(19) | O8-Eu1-O7     | 50.65(19)  |
| O10-Eu1-O5#3  | 109.94(17) | O10-Eu1-O7    | 103.5(2)   |
| O10-Eu1-O8    | 72.45(19)  | O11-Eu1-O5#3  | 140.69(16) |
| O11-Eu1-O6#3  | 146.69(18) | O11-Eu1-O7    | 70.07(17)  |
| O11-Eu1-O8    | 98.2(2)    | O11-Eu1-O10   | 73.3(2)    |

Symmetry transformations used to generate equivalent atoms: For Eu-TPTC, #1: $x, -y + 2, z + 1/2$ ; #2: $-x + 1/2, -y + 3/2, -z$ ; #3: $-x + 1/2, y - 1/2, -z - 1/2$ .

**Table S2** Standard curve of the maximum absorption wavelength of different types of dyes.

| Dyes | $\lambda_{\max}$ (nm) | Standard curve           | R <sup>2</sup> |
|------|-----------------------|--------------------------|----------------|
| MB   | 665                   | $y = 204.554x - 0.03169$ | 0.9989         |
| CV   | 592                   | $y = 130.575x - 0.01981$ | 0.9988         |
| RhB  | 555                   | $y = 96.176x - 0.00053$  | 0.9989         |
| NR   | 553                   | $y = 90.125x - 0.04397$  | 0.9921         |
| MO   | 466                   | $y = 62.025x + 0.00293$  | 0.9984         |
| CR   | 497                   | $y = 12.175x - 0.00253$  | 0.9772         |

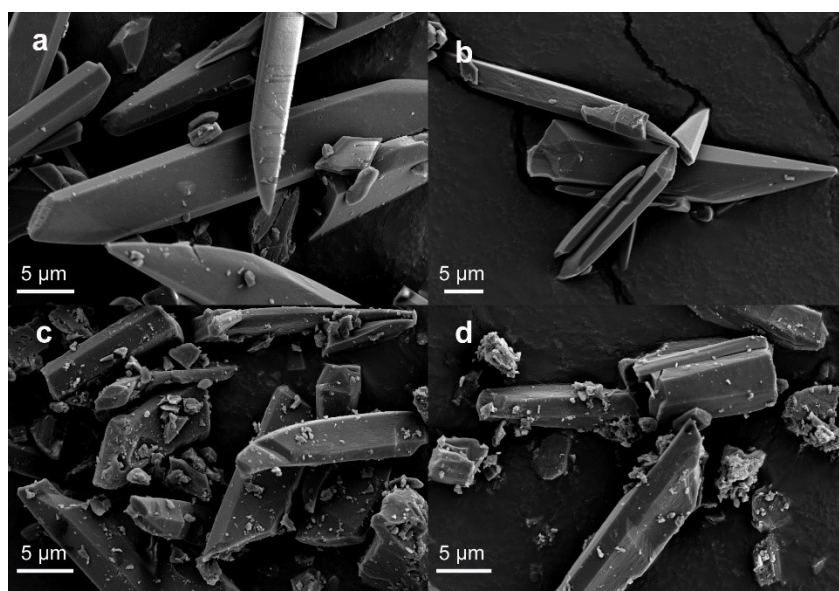

**Fig. S10.** SEM images of Eu-TPTC and Tb-TPTC before and after RhB degradation (a) Eu-TPTC; (b) Tb-TPTC; (c) Eu-TPTC after RhB degradation; (d) Tb-TPTC after RhB degradation.

### Adsorption kinetics

The following equation described the pseudo-second-order kinetics model.

$$kt = \frac{1}{C} - \frac{1}{C_0} \quad (1)$$

where  $C$  and  $C_0$  referred to the adsorption capacity at equilibrium and time  $t$  (h), respectively,  $k$  was the rate constant of second-order adsorption ( $L \cdot mg^{-1} \cdot h^{-1}$ ). From the plot of  $(C_0 - C)/C_0C$  versus  $t$ , as shown in Fig. S11, a linear graph could be fitted, from which values of  $C$  and  $k$  could be determined from the slope and the intercept, respectively.

**Table S3** Pseudo-second-order kinetics parameters for three different types of dyes adsorbed over Eu-TPTC

| Dyes | $C_0$ (mg L <sup>-1</sup> ) | $C$ (mg L <sup>-1</sup> ) | $k$ (L mg <sup>-1</sup> h <sup>-1</sup> ) | $R^2$ |
|------|-----------------------------|---------------------------|-------------------------------------------|-------|
| MB   | 9.024                       | 0.290                     | 0.759                                     | 0.921 |
| NR   | 8.387                       | 0.392                     | 0.430                                     | 0.928 |
| MO   | 10.210                      | 4.440                     | 0.024                                     | 0.959 |

**Table S4** Pseudo-second-order kinetics parameters for three different types of dyes adsorbed over Tb-TPTC

| Dyes | $C_0$ (mg L <sup>-1</sup> ) | $C$ (mg L <sup>-1</sup> ) | $k$ (L mg <sup>-1</sup> h <sup>-1</sup> ) | $R^2$ |
|------|-----------------------------|---------------------------|-------------------------------------------|-------|
| MB   | 9.249                       | 0.281                     | 1.030                                     | 0.940 |
| NR   | 7.745                       | 0.991                     | 0.166                                     | 0.971 |
| MO   | 9.921                       | 2.300                     | 0.063                                     | 0.909 |

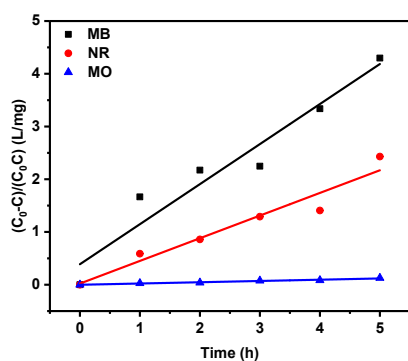

(a)

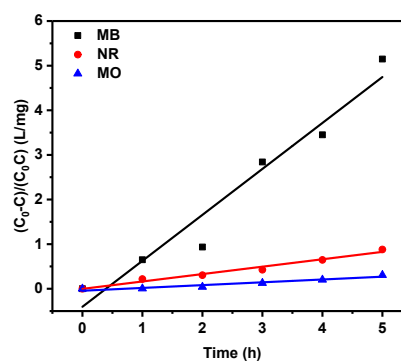

(b)

**Fig. S11.** Pseudo-second-order kinetic models for three different types of dyes (a) Eu-TPTC; (b) Tb-TPTC.
